# Supplementary material for: Improved Left Atrial Function in CRT Responders: A Systematic Review and Meta-Analysis
Source: PubMed Central journal article supplement (PMC7074461; doi:10.3390/jcm9020298), 2020-01-21
Supplement: jcm-09-00298-s001.pdf [file jcm-09-00298-s001.pdf]

Supplementary file

# Improved Left Atrial Function in CRT Responders: A Systematic Review and Meta-Analysis

Ibadete Bytyçi <sup>1,2</sup>, Gani Bajraktari <sup>1,2</sup>, Per Lindqvist <sup>1,3</sup> and Michael Y. Henein <sup>1,4,\*</sup>

<sup>1</sup> Institute of Public Health and Clinical Medicine, Umeå University, 90187 Umeå, Sweden; i.bytyci@hotmail.com (I.B.); gani.bajraktari@umu.se (G.B.); per.lindqvist@umu.se (P.L.)

<sup>2</sup> Clinic of Cardiology, University Clinical Centre of Kosovo, 10000, Prishtina, Kosovo

<sup>3</sup> Faculty of Medicine, Department of Surgical and Perioperative Sciences, Clinical Physiology, Umeå University, 90187 Umeå, Sweden

<sup>4</sup> Molecular and Clinic Research Institute, St George University, and Brunel University, SW17 0QT London, UK

\* Correspondence: michael.henein@umu.se; Tel.: +46-90-785-14-31

## Supplementary data

**Table S1: Supplement 1.** Summary of quality assessment analysis (Quality Assessment of Diagnostic Accuracy Studies-QUADAS 2).

| <b>Domain</b>         | <b>Questions</b>                                                                                                           | <b>Judgments</b>   |
|-----------------------|----------------------------------------------------------------------------------------------------------------------------|--------------------|
| <b>Risk of bias</b>   |                                                                                                                            |                    |
| 1) Patient selection  | <i>Was a consecutive or random sample of patients enrolled?</i>                                                            | Yes, No, Unclear   |
|                       | <i>Was a case-control design avoided?</i>                                                                                  | Yes, No, Unclear   |
|                       | <i>Did the study avoid inappropriate exclusions?</i>                                                                       | Yes, No, Unclear   |
|                       | <i>Could the selection of patients have introduced bias?</i>                                                               | Low, High, Unclear |
| <b>Applicability</b>  | <i>Is there concern that the included patients do not match the review questions?</i>                                      | Low, High, Unclear |
| 1) Patient selection  |                                                                                                                            |                    |
| <b>Risk of bias</b>   | <i>Were the index test results interpreted without knowledge of the results of the reference standard?</i>                 | Yes, No, Unclear   |
| 2) Index test         | <i>If a threshold was used, was it pre-specified?</i>                                                                      | Yes, No, Unclear   |
|                       | <i>Could the conduct or interpretation of the index test have introduced bias?</i>                                         | Low, High, Unclear |
| <b>Applicability</b>  | <i>Is there concern that the index test, its conduct, or interpretation differ from the review question?</i>               | Low, High, Unclear |
| 2) Index test         |                                                                                                                            |                    |
| <b>Risk of bias</b>   | <i>Is the reference standard likely to correctly classify the target condition?</i>                                        | Yes, No, Unclear   |
| 3) Reference standard | <i>Were the reference standard results interpreted without knowledge of the results of the index test?</i>                 | Yes, No, Unclear   |
|                       | <i>Could the reference standard, its conduct, or its interpretation have introduced bias?</i>                              | Low, High, Unclear |
| <b>Applicability</b>  | <i>Is there concern that the target condition as defined by the reference standard does not match the review question?</i> | Low, High, Unclear |
| 3) Reference standard |                                                                                                                            |                    |
| <b>Risk of bias</b>   | <i>Was there an appropriate interval between index test(s) and reference standard?</i>                                     | Yes, No, Unclear   |
| 4) Flow and timing    | <i>Did all patients receive a reference standard?</i>                                                                      | Yes, No, Unclear   |
|                       | <i>Did patients receive the same reference standard?</i>                                                                   | Yes, No, Unclear   |
|                       | <i>Were all patients included in the analysis?</i>                                                                         | Yes, No, Unclear   |
|                       | <i>Could the patient flow have introduced bias?</i>                                                                        | Low, High, Unclear |

**Patients:** Patients undergo CRT; Criteria for CRT.

**Index test:** Relationship between CRT responders and LA function

**Comparator test (if applicable):** Correlations of LA function parameters

**Target condition:** Correlations of LA function on related mean change of LVESV and/or LVEF;

**Reference standard:** Guidelines of heart failure and indications of Cardiac resynchronization therapy in heart failure.

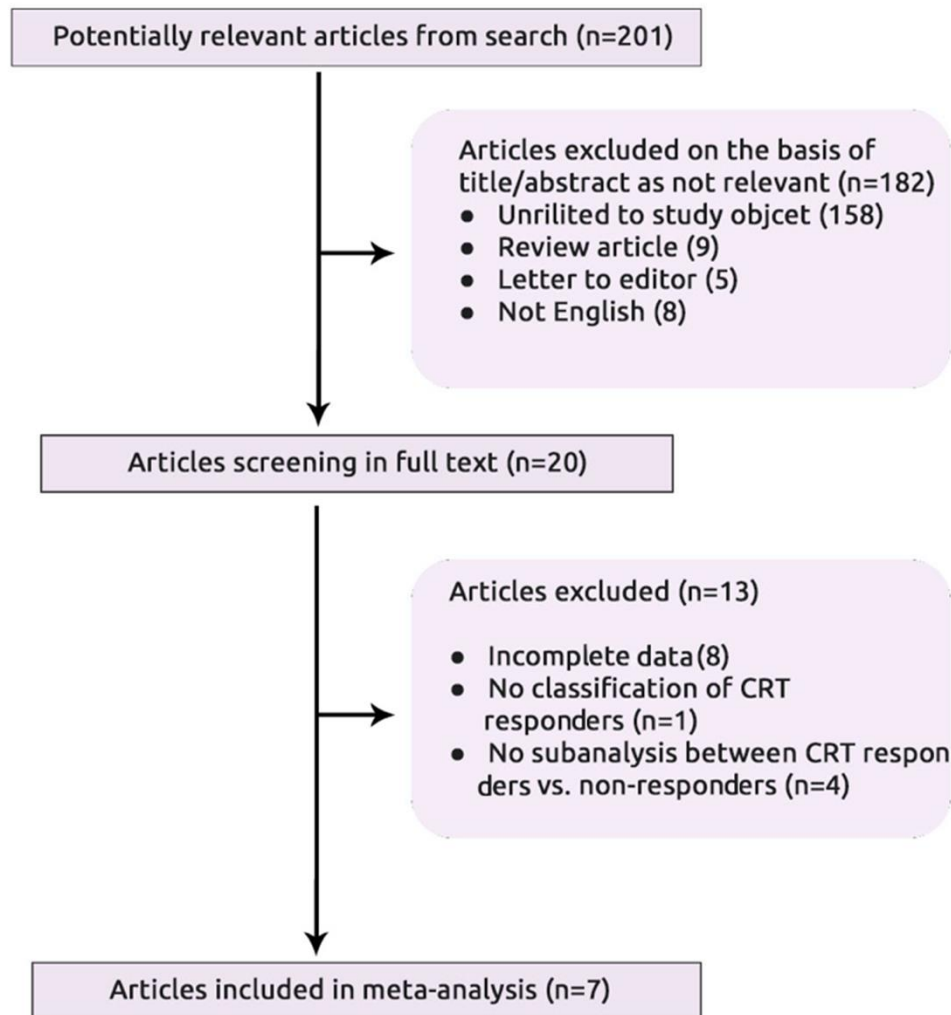

Figure 1. Supplement 2. Flow chart of study section.

**Table S2: Supplement 3.** Echocardiographic characteristics of LA functional measurements.

| Study (Year)  | Software      | Platform | Probe (MHz) | FR    | Gating | Observer       | Tissue Tracking | LA function measurements              |                       |
|---------------|---------------|----------|-------------|-------|--------|----------------|-----------------|---------------------------------------|-----------------------|
|               |               |          |             |       |        |                |                 | PALS                                  | LA total EF           |
| Yo 2007       | GE Vivid 7    | EchoPac  | NR          | NR    | R-R    | Two blinded    | End-myocardial  | Peak LA wall strain during LV systole | LAVmax-LAVmin /LAVmax |
| Marsan 2008   | iE33 Philips  | QLAB     | NR          | 20–35 | -      | Single blinded | -               | -                                     | LAVmax-LAVmin /LAVmax |
| Donal 2009    | GE Vivid 7    | EchoPac  | NR          | NR    | R-R    | Two blinded    | Endo-epicardial | Peak LA wall strain during LV systole | LAVmax-LAVmin /LAVmax |
| Fenon 2015    | GE Vivid 9    | EchoPac  | 2.5         | 60–80 | R-R    | Two blinded    | Endocardial     | Peak LA wall strain during LV systole | -                     |
| Valenzia 2016 | GE Vivid 7    | EchoPac  | 3.5         | NR    | R-R    | Single blinded | Endocardial     | Peak LA wall strain during LV systole | -                     |
| Badran 2017   | GE Healthcare | EchoPac  | 2.5         | NR    | R-R    | Single blinded | Endocardial     | Peak LA wall strain during LV systole | LAVmax-LAVmin /LAVmax |
| Hansen 2017   | GE Vivid 9    | EchoPac  | 3–5         | NR    | -      | Single blinded | -               | -                                     | LAVmax-LAVmin /LAVmax |

a) Baseline of LVEDV in CRT responders vs. CRT non responders

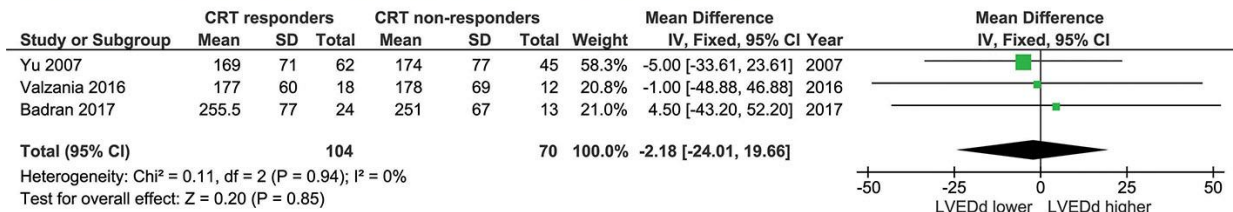

a) Baseline of LVESV in CRT responders vs. CRT non responders

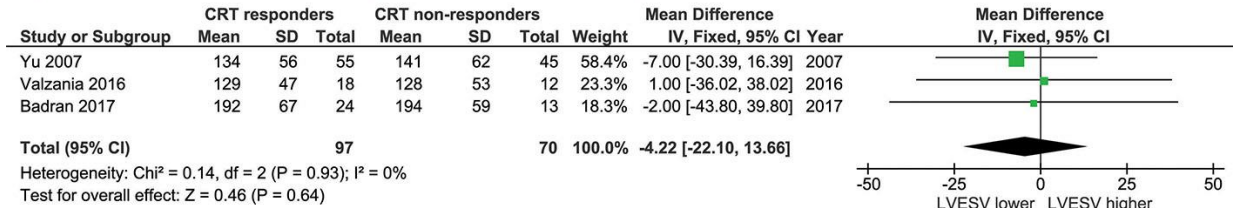

c) Baseline of LVEDd in CRT responders vs. CRT non responders

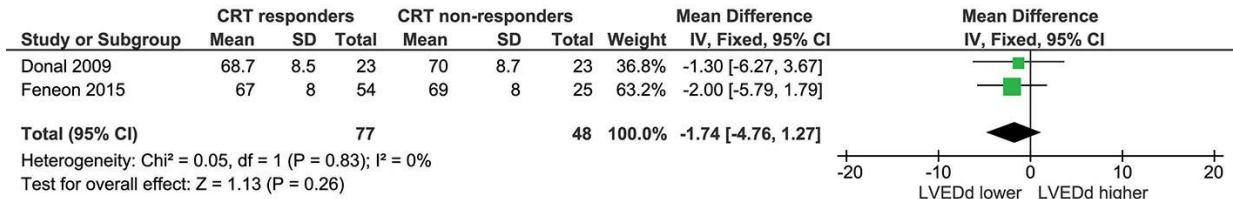

d) Baseline of LVEF in CRT responders vs. CRT non responders

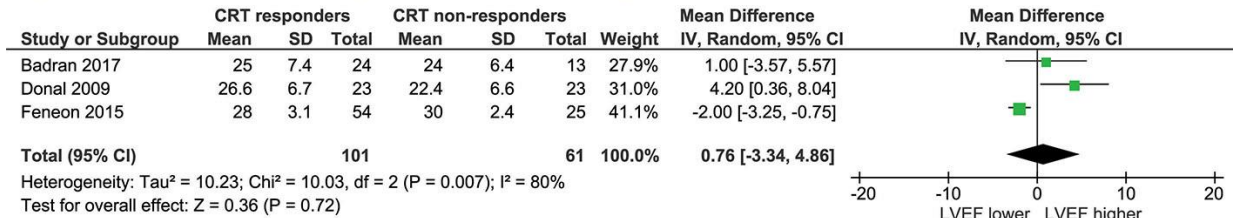

**Figure S2: Supplement 4.** Comparison of baseline LVEDV, LVESV, LVEDd and EF in group of patients with CRT responds vs. CRT non responders.

a) Baseline of QRS duration in CRT responders vs. CRT non responders

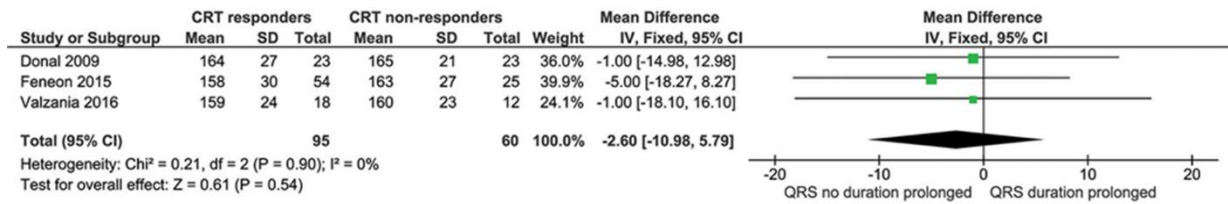

a) Baseline of LAD in CRT responders vs. CRT non responders

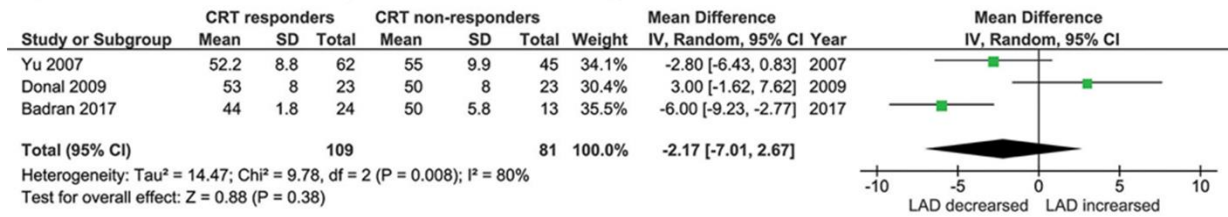

**Figure S3: Supplement 5.** Comparison of baseline QRS duration and LA dimension in group of patients with CRT responders vs. CRT non responders.

### Correlation between LA strain and LAEF

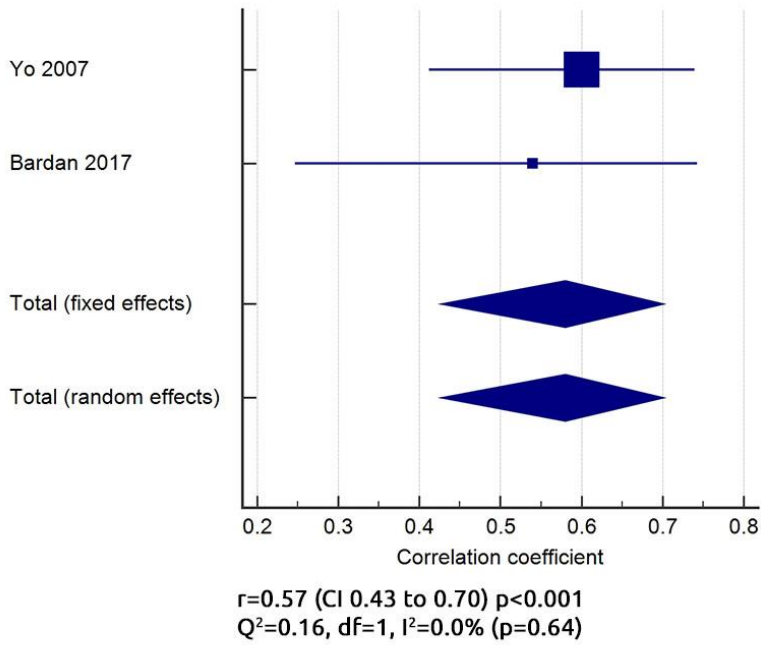

Figure S4: Supplement 6. Weighted summary correlation between LA strain and LAEF.

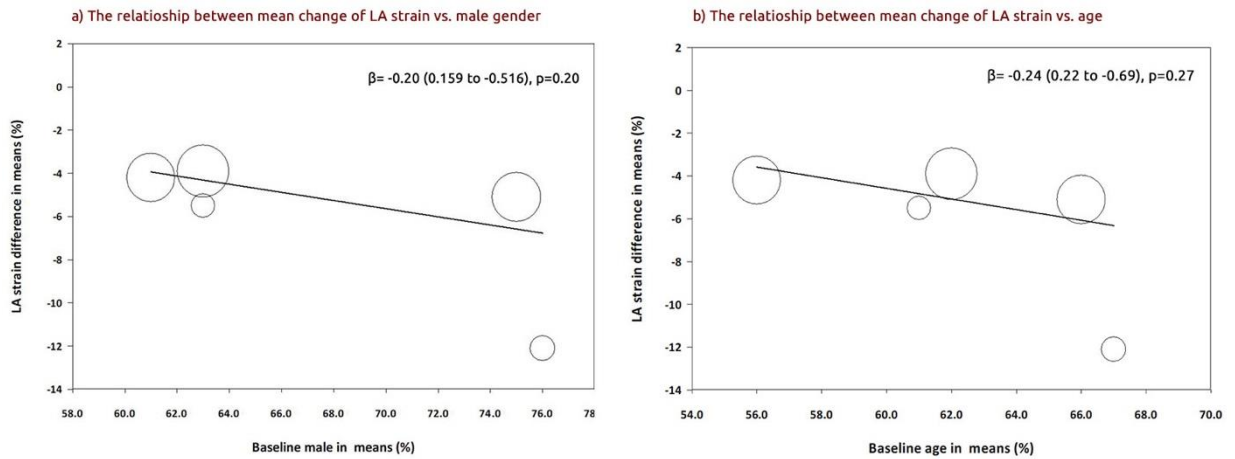

Figure S5: Supplement 7. Relationship between LA strain change and a) male gender; b) age.

Table S3: Supplement 8. Summary of QUADAS-2 Assessment of Selected Studies.

| Author (year) reference | Risk of bias       |            |                    |                 | Applicability concerns |            |                    |
|-------------------------|--------------------|------------|--------------------|-----------------|------------------------|------------|--------------------|
|                         | Patients selection | Index test | Reference standard | Flow and timing | Patients selection     | Index test | Reference standard |
| Yo 2007                 | Low                | Low        | Low                | Low             | Low                    | Low        | Low                |
| Marsan 2008             | Low                | Low        | Low                | Low             | Low                    | Low        | Low                |
| Donal 2009              | Low                | Unclear    | Low                | Low             | Low                    | Unclear    | Unclear            |
| Feneon 2015             | Low                | Unclear    | Unclear            | Unclear         | Unclear                | Unclear    | Unclear            |
| Valenzia 2016           | Low                | Low        | Low                | Low             | Low                    | Low        | Low                |
| Badran 2017             | Low                | Low        | Low                | Low             | Low                    | Low        | Low                |
| Hansen 2017             | Unclear            | Low        | High               | High            | Unclear                | Low        | High               |

QUADAS-2: Quality Assessment of Diagnostic Accuracy Studies-2.

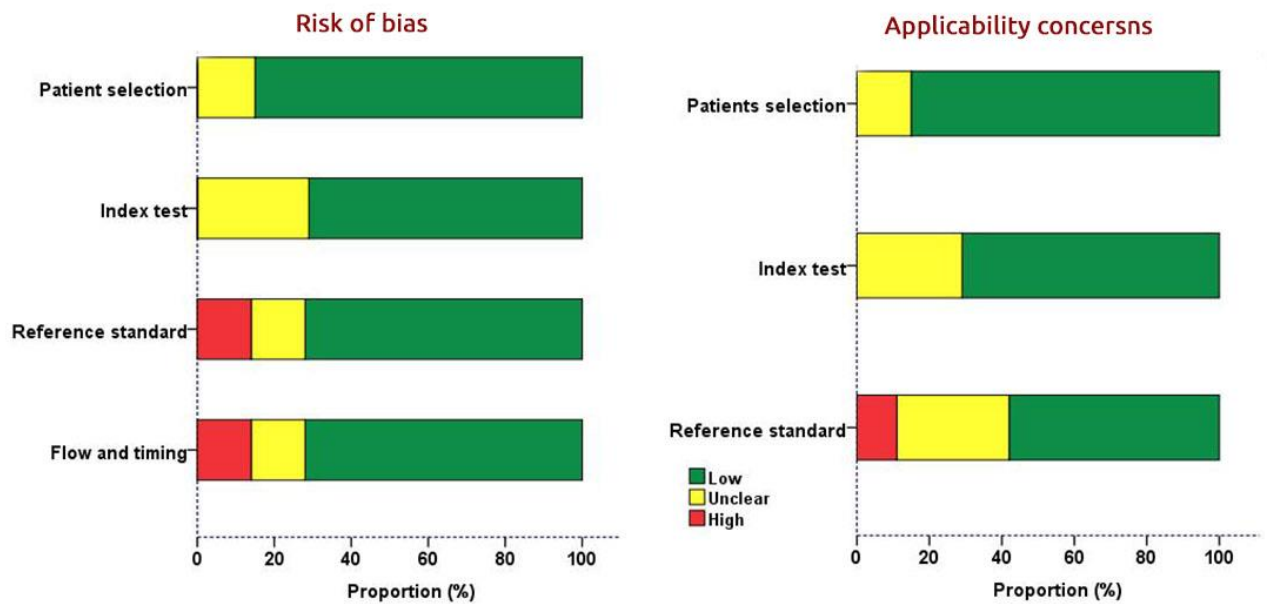

Figure 6. Supplement 9. Summary of QUADAS-2 Assessment of Selected Studies.
